# Supplementary material for: Synthesis of functionalized N-doped graphene DNA hybrid material in a deep eutectic solvent
Source: Royal Society of Chemistry journal article supplement (doi:10.1039/c6gc00853d), 2016-01-01
Supplement: c6gc00853d1.pdf [file c6gc00853d1.pdf]

## Electronic Supporting information

### Synthesis of functionalized N-doped graphene DNA hybrid material in a deep eutectic solvent

Jitkumar Bhatt, <sup>a,b</sup> Dibyendu Mondal, <sup>a,b,c</sup> Ranjitsinh V. Devkar, <sup>d</sup> & Kamalesh Prasad \* <sup>a,b</sup>

<sup>a</sup> Natural Products & Green Chemistry Division, CSIR-Central Salt & Marine Chemicals Research Institute, G. B Marg, Bhavnagar-364002 (Gujarat), India. Ph : +91-278-2567760 Fax : +91-278-2567562 [e-mail : [kamlesh@csmcri.org](mailto:kamlesh@csmcri.org) / [drkamaleshp@gmail.com](mailto:drkamaleshp@gmail.com)].

<sup>b</sup> AcSIR-Central Salt & Marine Chemicals Research Institute, G. B Marg, Bhavnagar-364002 (Gujarat), India.

<sup>c</sup> Present address : CICECO - Aveiro Institute of Materials, Department of Chemistry, University of Aveiro, 3810-193 Aveiro, Portugal

<sup>d</sup> Division of Phytotherapeutics and Metabolic Endocrinology, Department of Zoology, Faculty of Science, The M.S. University of Baroda, Vadodara 390 002, Gujarat, India.

**Table S1** : Elemental analysis of graphene oxide and N-graphene

| Entry          | %N    | %C    | %H   | %S   |
|----------------|-------|-------|------|------|
| Graphene oxide | 0.00  | 56.10 | 3.51 | 0.00 |
| N-Graphene     | 38.95 | 43.89 | 2.69 | 0.00 |

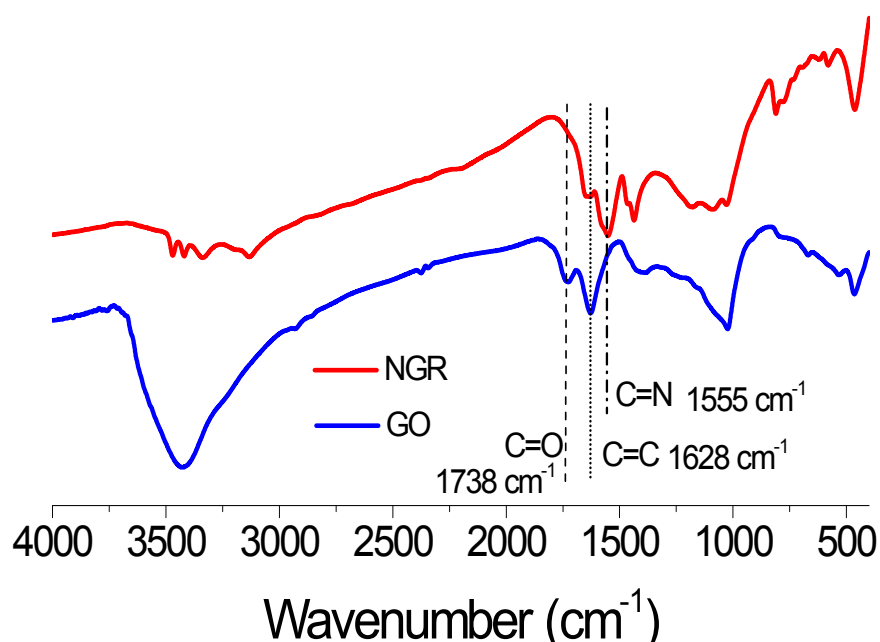

**Figure S1** : FT-IR spectra of graphene oxide and N-graphene

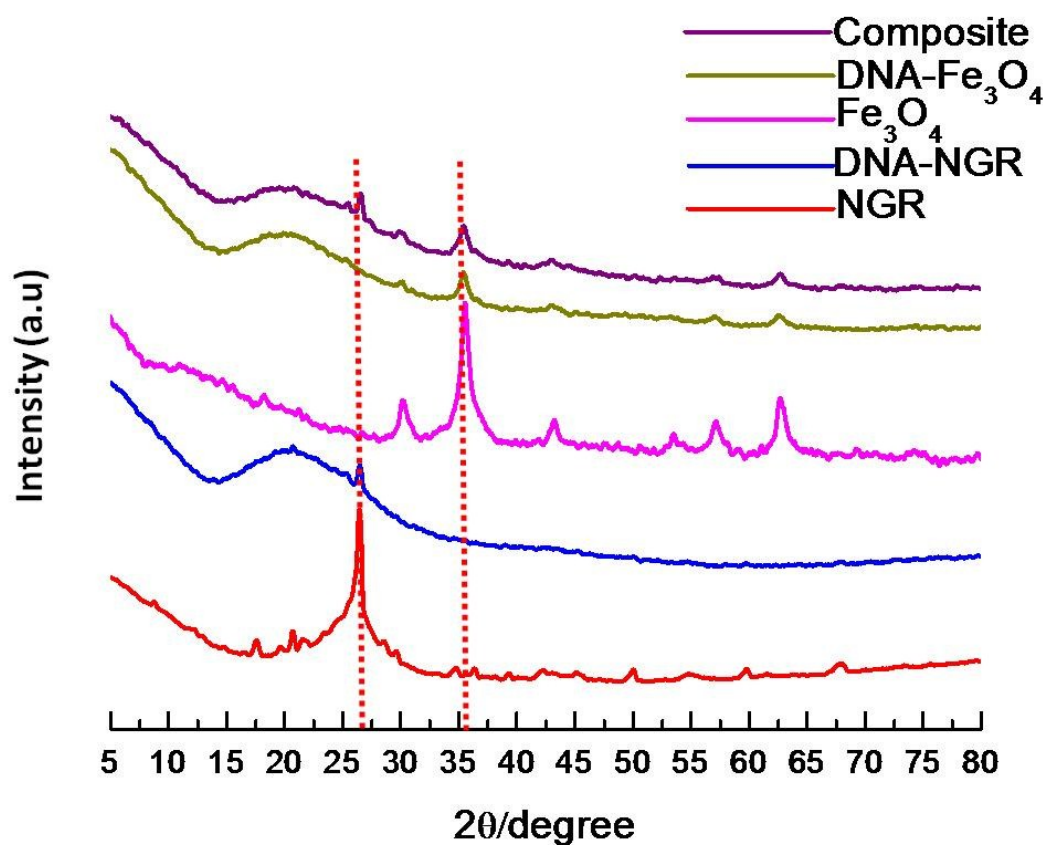

**Figure S2 :** Comparison of powder XRD profile of the hybrid material with other compositions and standards.

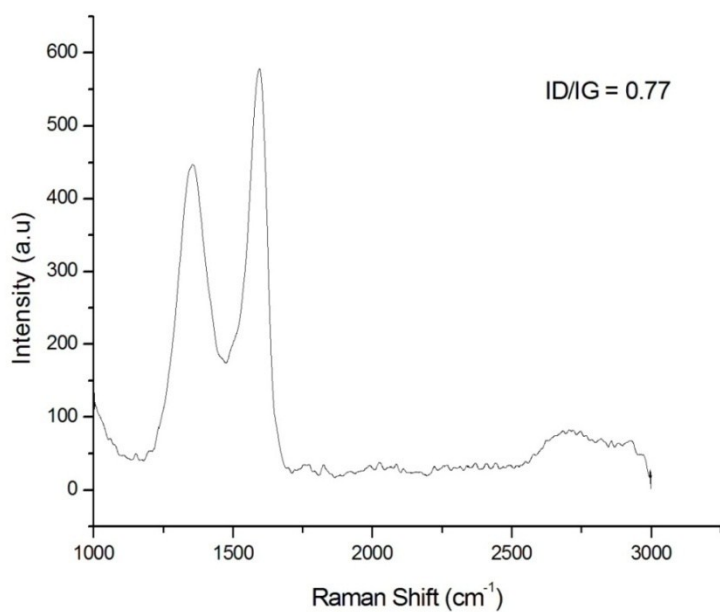

**Figure S3 :** Raman spectra of graphene oxide

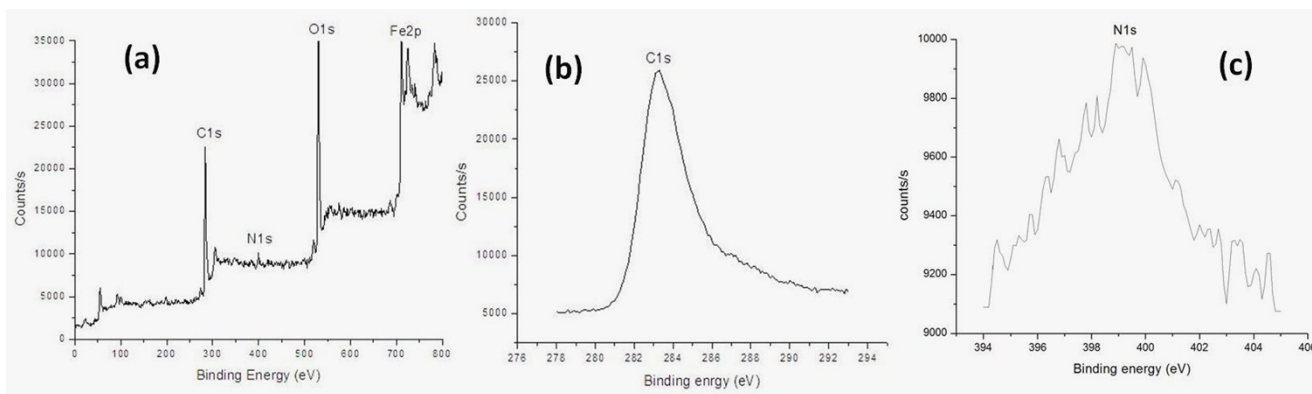

**Figure S4 :** (a) Survey XPS spectra of N-graphene-DNA hybrid (b) high resolution C1s and (c) N1s spectra of the hybrid material.

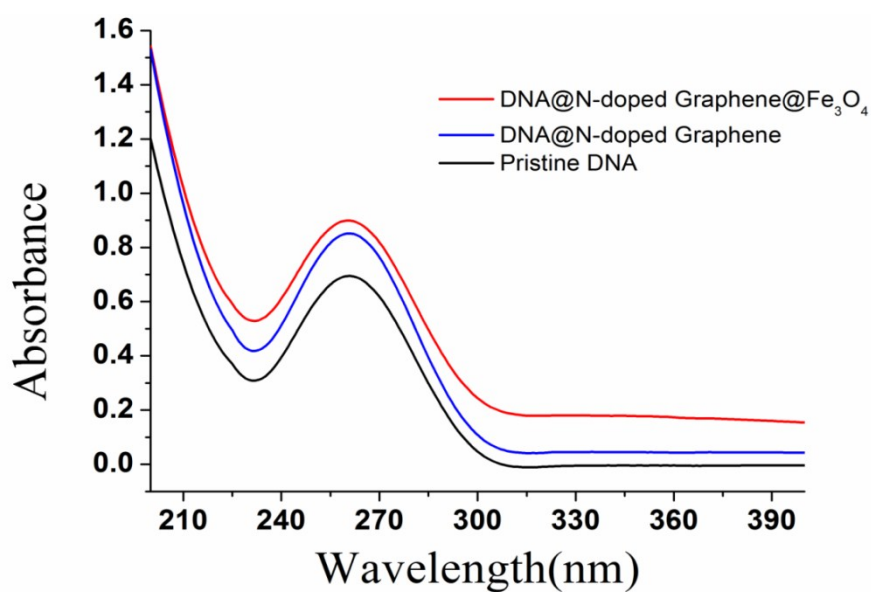

**Figure S5 :** UV-Vis spectra of standard DNA, DNA + N-graphene and magnetic DNA-N-graphene hybrid material.

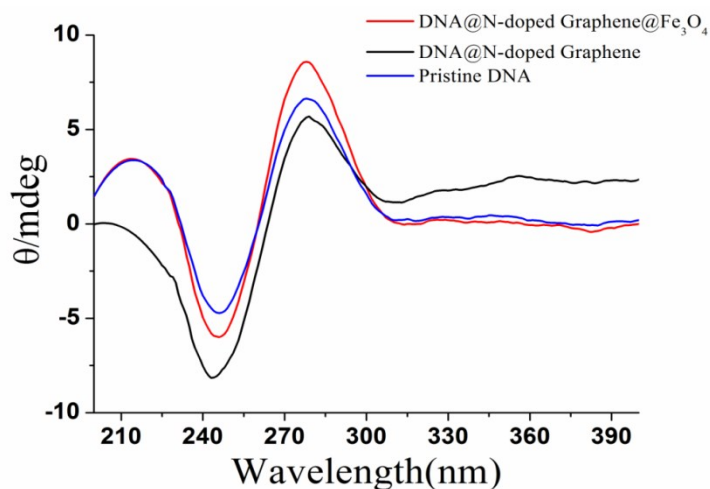

**Figure S6 :** CD spectra of standard DNA, DNA + N-graphene and magnetic DNA-N-graphene hybrid material.

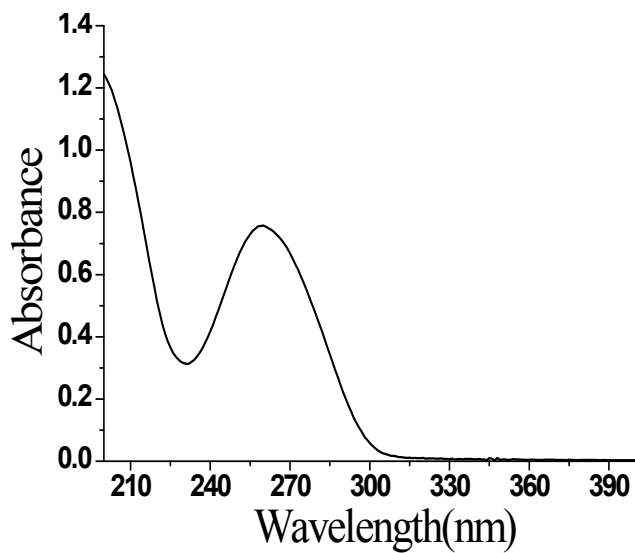

**Figure S7** : UV-Vis spectra of hybrid material after six months of storage at room temperature.

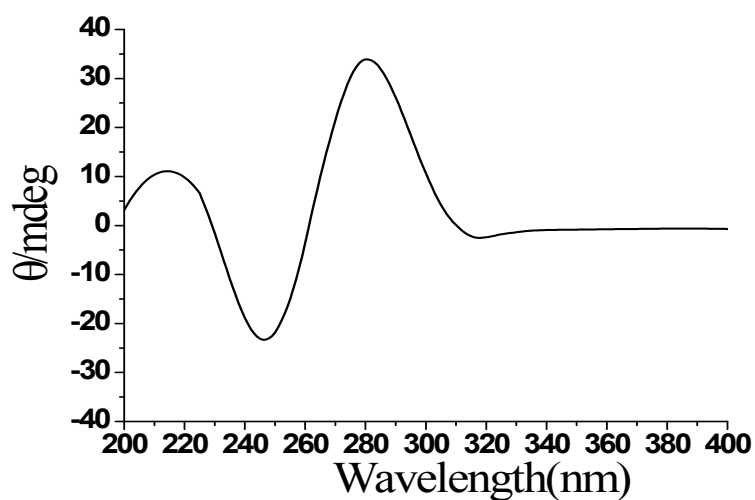

**Figure S8** : CD spectra of hybrid after six months of storage at room temperature.

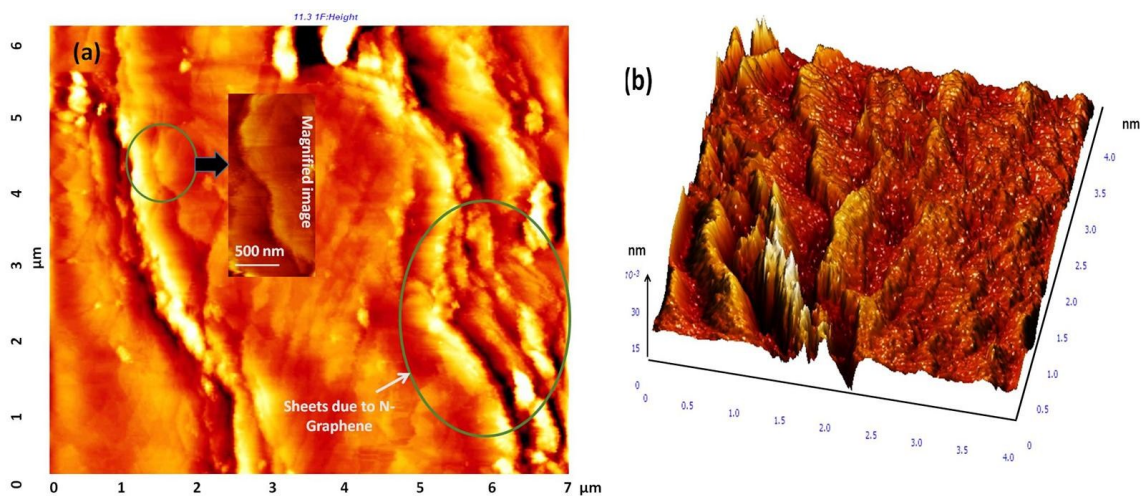

**Figure S9** : AFM images of (a) DNA-N-graphene hybrid material and (b) 3D distribution image of the surface.
